# Supplementary material for: Disparity in Risk Factor Severity for Early Childhood Blood Lead among Predominantly African-American Black Children: The 1999 to 2010 US NHANES
Source: PubMed Central journal article supplement (PMC7084658; doi:10.3390/ijerph17051552), 2020-02-28
Supplement: ijerph-17-01552-s001.pdf [file ijerph-17-01552-s001.pdf]

**Table S1.** Racial/ethnic differences in continuous BLLs or an EBLL  $\geq 5$   $\mu\text{g/dL}$  before and after the exclusion of cases with missing data.

| Race/Ethnicity | Sampled Data   | Sample (%)   | BLL (in $\mu\text{g/dL}$ )      | EBLL ( $\geq 5$ $\mu\text{g/dL}$ ) |
|----------------|----------------|--------------|---------------------------------|------------------------------------|
|                |                |              | <i>Mean <math>\pm</math> SD</i> | <i>Mean <math>\pm</math> SE</i>    |
| Hispanic       | Total          | 1954 (41.0%) | 1.96 $\pm$ 1.81                 | 5.0% $\pm$ 0.5%                    |
|                | Modeled sample | 1025 (36.1%) | 1.82 $\pm$ 1.71                 | 4.4% $\pm$ 0.6%                    |
|                | Excluded cases | 929 (48.2%)  | 2.12 $\pm$ 1.91                 | 5.6% $\pm$ 0.8%                    |
| NH White       | Total          | 1519 (31.8%) | 2.01 $\pm$ 1.83                 | 6.1% $\pm$ 0.6%                    |
|                | Modeled sample | 1208 (42.5%) | 1.94 $\pm$ 1.83                 | 5.5% $\pm$ 0.7%                    |
|                | Excluded cases | 311 (16.1%)  | 2.26 $\pm$ 1.80                 | 8.7% $\pm$ 1.6%                    |
| NH Black       | Total          | 1297 (27.2%) | 3.18 $\pm$ 3.55                 | 17.2% $\pm$ 1.0%                   |
|                | Modeled sample | 608 (21.4%)  | 2.81 $\pm$ 2.95                 | 12.0% $\pm$ 1.3%                   |
|                | Excluded cases | 689 (35.7%)  | 3.51 $\pm$ 3.99                 | 21.8% $\pm$ 1.6%                   |
| Total          | Total          | 4770 (100%)  | 2.31 $\pm$ 2.48                 | 8.7% $\pm$ 0.4%                    |
|                | Modeled sample | 2841 (59.6%) | 2.08 $\pm$ 2.12                 | 6.5% $\pm$ 0.5%                    |
|                | Excluded cases | 1929 (40.4%) | 2.64 $\pm$ 2.89                 | 11.9% $\pm$ 0.7%                   |

**Table S2.** Continuous BLLs or an elevated EBLL  $\geq 5$   $\mu\text{g}/\text{dL}$  after inclusion of unknown housing age in multiple regression analysis.

| Independent Variable                | BLL (in $\mu\text{g}/\text{dL}$ ) |                 |          | EBLL ( $\geq 5$ $\mu\text{g}/\text{dL}$ ) |               |          |
|-------------------------------------|-----------------------------------|-----------------|----------|-------------------------------------------|---------------|----------|
|                                     | B Coeff. ( $\beta$ )              | 95% CI          | p-Value  | Odds Ratio                                | 95% CI        | p-Value  |
| <b>Age in Years</b>                 |                                   |                 |          |                                           |               |          |
| 4–5 years                           | Reference                         | –               | –        | Reference                                 | –             | –        |
| 3 years                             |                                   |                 |          | 1.3                                       | 0.85 to 2.0   | 0.218    |
| 2 years                             | +0.16 per unit (+0.083)           | +0.08 to +0.23  | <0.001** | 1.8                                       | 1.2 to 2.8    | 0.007**  |
| 1 year                              |                                   |                 |          | 1.9                                       | 1.2 to 3.2    | 0.012**  |
| <b>Anemia</b>                       |                                   |                 |          |                                           |               |          |
| No                                  | Reference                         | –               | –        | Reference                                 | –             | –        |
| Yes                                 | +0.08 (+0.008)                    | –0.18 to +0.34  | 0.557    | 1.2                                       | 0.80 to 1.9   | 0.330    |
| <b>Binary Gender</b>                |                                   |                 |          |                                           |               |          |
| Female                              | Reference                         | –               | –        | Reference                                 | –             | –        |
| Male                                | +0.11 (+0.025)                    | –0.01 to +0.24  | 0.082    | 1.3                                       | 0.98 to 1.6   | 0.070    |
| <b>Bodyweight (in kg)</b>           |                                   |                 |          |                                           |               |          |
| (scaled)                            | –0.03 (–0.061)                    | –0.05 to –0.01  | 0.004**  | 0.95                                      | 0.91 to 0.998 | 0.042*   |
| <b>Health Insurance Coverage</b>    |                                   |                 |          |                                           |               |          |
| Yes                                 | Reference                         | –               | –        | Reference                                 | –             | –        |
| No                                  | +0.18 (+0.026)                    | –0.03 to +0.39  | 0.086    | 1.3                                       | 0.85 to 1.9   | 0.235    |
| <b>Household Income Level</b>       |                                   |                 |          |                                           |               |          |
| Middle to upper class               | Reference                         | –               | –        | Reference                                 | –             | –        |
| Low income                          | +0.23 per unit (+0.088)           | +0.14 to +0.33  | <0.001** | 1.8                                       | 1.2 to 2.7    | 0.005**  |
| Poverty                             |                                   |                 |          | 2.2                                       | 1.5 to 3.4    | <0.001** |
| <b>Indoor Household Smoking</b>     |                                   |                 |          |                                           |               |          |
| No                                  | Reference                         | –               | –        | Reference                                 | –             | –        |
| Yes                                 | +0.62 (+0.106)                    | +0.45 to +0.79  | <0.001** | 2.0                                       | 1.5 to 2.6    | <0.001** |
| <b>Low Birthweight</b>              |                                   |                 |          |                                           |               |          |
| No                                  | Reference                         | –               | –        | Reference                                 | –             | –        |
| Yes                                 | +0.14 (+0.018)                    | –0.07 to +0.35  | 0.202    | 1.5                                       | 1.1 to 2.1    | 0.024*   |
| <b>Medicaid/CHIP Enrollment</b>     |                                   |                 |          |                                           |               |          |
| No                                  | Reference                         | –               | –        | Reference                                 | –             | –        |
| Yes                                 | +0.04 (+0.009)                    | –0.11 to +0.20  | 0.599    | 1.1                                       | 0.86 to 1.5   | 0.369    |
| <b>Primary Guardian Education</b>   |                                   |                 |          |                                           |               |          |
| Some college or higher              | Reference                         | –               | –        | Reference                                 | –             | –        |
| 12th grade or GED                   |                                   |                 |          | 1.1                                       | 0.76 to 1.5   | 0.732    |
| Less than 12th grade or GED         | +0.08 per unit (+0.031)           | –0.002 to +0.16 | 0.056    | 1.3                                       | 0.91 to 1.7   | 0.164    |
| <b>Race/Ethnicity</b>               |                                   |                 |          |                                           |               |          |
| NH White or Hispanic                | Reference                         | –               | –        | Reference                                 | –             | –        |
| NH Black                            | +0.89 (+0.179)                    | +0.75 to +1.04  | <0.001** | 3.6                                       | 2.8 to 4.6    | <0.001** |
| <b>Survey Years</b>                 |                                   |                 |          |                                           |               |          |
| 1999 to 2002                        | Reference                         | –               | –        | Reference                                 | –             | –        |
| 2003 to 2006                        |                                   |                 |          | 0.45                                      | 0.34 to 0.59  | <0.001** |
| 2007 to 2010                        | –0.41 per unit (–0.147)           | –0.49 to –0.33  | <0.001** | 0.32                                      | 0.23 to 0.44  | <0.001** |
| <b>Water Treatment Devices Used</b> |                                   |                 |          |                                           |               |          |
| No                                  | Reference                         | –               | –        | Reference                                 | –             | –        |
| Yes                                 | –0.12 (–0.023)                    | –0.28 to +0.04  | 0.130    | 0.89                                      | 0.61 to 1.3   | 0.558    |
| <b>WIC Enrollment</b>               |                                   |                 |          |                                           |               |          |
| No                                  | Reference                         | –               | –        | Reference                                 | –             | –        |
| Yes                                 | –0.08 (–0.018)                    | –0.22 to +0.07  | 0.284    | 0.92                                      | 0.70 to 1.2   | 0.540    |
| <b>Year Housing Built</b>           |                                   |                 |          |                                           |               |          |
| 1978 to present                     | Reference                         | –               | –        | Reference                                 | –             | –        |
| 1950 to 1977                        |                                   |                 |          | 1.8                                       | 1.2 to 2.9    | 0.009**  |
| Unknown                             | +0.37 per unit (+0.175)           | +0.31 to +0.43  | <0.001** | 2.6                                       | 1.8 to 3.9    | <0.001** |
| Before 1950                         |                                   |                 |          | 7.4                                       | 4.8 to 11.2   | <0.001** |

**Statistical significance:** \* P-value equal to 5% or less; \*\* P-value equal to  $\leq 1\%$  or less.

**Table S3.** Continuous BLLs or an EBLL  $\geq 5$   $\mu\text{g/dL}$  among children with current or recent anemia in multiple regression analysis.

| Independent Variable                | BLL (in $\mu\text{g/dL}$ ) |                |                    | EBLL ( $\geq 5$ $\mu\text{g/dL}$ ) |                |                |
|-------------------------------------|----------------------------|----------------|--------------------|------------------------------------|----------------|----------------|
|                                     | B Coeff. ( $\beta$ )       | 95% CI         | p-Value            | Odds Ratio                         | 95% CI         | p-Value        |
| <b>Age in Years</b>                 |                            |                |                    |                                    |                |                |
| 4–5 years                           | Reference                  | –              | –                  | Reference                          | –              | –              |
| 3 years                             |                            |                |                    | 40                                 | 0.48 to 3400   | 0.102          |
| 2 years                             | +0.76 per unit (+0.295)    | +0.14 to +1.38 | <b>0.016*</b>      | 79                                 | 0.82 to 7600   | 0.061          |
| 1 year                              |                            |                |                    | 1200                               | 3.1 to 450,000 | <b>0.020*</b>  |
| <b>Binary Gender</b>                |                            |                |                    |                                    |                |                |
| Female                              | Reference                  | –              | –                  | Reference                          | –              | –              |
| Male                                | –0.42 (–0.069)             | –1.36 to +0.52 | 0.378              | 0.63                               | 0.12 to 3.3    | 0.578          |
| <b>Bodyweight (in kg)</b>           |                            |                |                    |                                    |                |                |
| (scaled)                            | +0.09 (+0.136)             | –0.07 to +0.25 | 0.259              | 1.2                                | 0.76 to 1.8    | 0.484          |
| <b>Health Insurance Coverage</b>    |                            |                |                    |                                    |                |                |
| Yes                                 | Reference                  | –              | –                  | Reference                          | –              | –              |
| No                                  | +1.18 (+0.128)             | +0.34 to +2.70 | 0.126              | 22                                 | 1.9 to 270     | <b>0.014**</b> |
| <b>Household Income Level</b>       |                            |                |                    |                                    |                |                |
| Middle to upper class               | Reference                  | –              | –                  | Reference                          | –              | –              |
| Low income                          |                            |                |                    | 1.3                                | 0.12 to 14     | 0.831          |
| Poverty                             | +0.09 per unit (+0.026)    | –0.60 to +0.78 | 0.799              | 0.93                               | 0.10 to 8.4    | 0.948          |
| <b>Indoor Household Smoking</b>     |                            |                |                    |                                    |                |                |
| No                                  | Reference                  | –              | –                  | Reference                          | –              | –              |
| Yes                                 | –0.37 (–0.043)             | –1.70 to 0.96  | 0.585              | 0.27                               | 0.03 to 2.6    | 0.258          |
| <b>Low Birthweight</b>              |                            |                |                    |                                    |                |                |
| No                                  | Reference                  | –              | –                  | Reference                          | –              | –              |
| Yes                                 | +0.99 (+0.078)             | –0.96 to +2.94 | 0.318              | 33                                 | 1.3 to 830     | <b>0.033*</b>  |
| <b>Medicaid/CHIP Enrollment</b>     |                            |                |                    |                                    |                |                |
| No                                  | Reference                  | –              | –                  | Reference                          | –              | –              |
| Yes                                 | +0.44 (+0.071)             | –0.69 to 1.56  | 0.445              | 15                                 | 1.7 to 130     | <b>0.015*</b>  |
| <b>Primary Guardian Education</b>   |                            |                |                    |                                    |                |                |
| Some college or higher              | Reference                  | –              | –                  | Reference                          | –              | –              |
| 12th grade or GED                   |                            |                |                    | 0.33                               | 0.04 to 2.8    | 0.306          |
| Less than 12th grade or GED         | +0.40 per unit (+0.114)    | –0.19 to 1.00  | 0.184              | 0.71                               | 0.11 to 4.7    | 0.716          |
| <b>Race/Ethnicity</b>               |                            |                |                    |                                    |                |                |
| NH White or Hispanic                | Reference                  | –              | –                  | Reference                          | –              | –              |
| NH Black                            | +1.26 (+0.191)             | +0.22 to +2.31 | <b>0.018*</b>      | 9.2                                | 1.5 to 58      | <b>0.018*</b>  |
| <b>Survey Years</b>                 |                            |                |                    |                                    |                |                |
| 1999 to 2002                        | Reference                  | –              | –                  | Reference                          | –              | –              |
| 2003 to 2006                        |                            |                |                    | 0.61                               | 0.12 to 3.1    | 0.547          |
| 2007 to 2010                        | –0.76 per unit (–0.211)    | –1.31 to –0.21 | <b>0.007**</b>     | 0.12                               | 0.02 to 0.92   | <b>0.041*</b>  |
| <b>Water Treatment Devices Used</b> |                            |                |                    |                                    |                |                |
| No                                  | Reference                  | –              | –                  | Reference                          | –              | –              |
| Yes                                 | –0.25 (–0.035)             | –1.37 to –0.87 | 0.661              | 0.31                               | 0.04 to 2.5    | 0.266          |
| <b>WIC Enrollment</b>               |                            |                |                    |                                    |                |                |
| No                                  | Reference                  | –              | –                  | Reference                          | –              | –              |
| Yes                                 | +0.25 (+0.042)             | –0.77 to +1.27 | 0.624              | 0.28                               | 0.05 to 1.5    | 0.275          |
| <b>Year Housing Built</b>           |                            |                |                    |                                    |                |                |
| 1978 to present                     | Reference                  | –              | –                  | Reference                          | –              | –              |
| 1950 to 1977                        |                            |                |                    | 5.1                                | 0.81 to 32     | 0.083          |
| Before 1950                         | +1.29 per unit (+0.324)    | +0.67 to 1.91  | <b>&lt;0.001**</b> | 27                                 | 3.1 to 230     | <b>0.003**</b> |

**Statistical significance:** \* P-value equal to 5% or less; \*\* P-value equal to  $\leq 1\%$  or less.

**Table S4.** Continuous BLLs or an EBLL  $\geq 5$   $\mu\text{g/dL}$  after inclusion of dietary Ca, Fe, and Zn intake in multiple regression analysis.

| Independent Variable                | BLL (in $\mu\text{g/dL}$ ) |                     |          | EBLL ( $\geq 5$ $\mu\text{g/dL}$ ) |                 |          |
|-------------------------------------|----------------------------|---------------------|----------|------------------------------------|-----------------|----------|
|                                     | B Coeff. ( $\beta$ )       | 95% CI              | p-Value  | Odds Ratio                         | 95% CI          | p-Value  |
| <b>Age in Years</b>                 |                            |                     |          |                                    |                 |          |
| 4–5 years                           | Reference                  | –                   | –        | Reference                          | –               | –        |
| 3 years                             | +0.17 per unit             | +0.08 to +0.25      | <0.001** | 1.9                                | 0.99 to 3.6     | 0.054*   |
| 2 years                             | (+0.103)                   |                     |          | 2.7                                | 1.4 to 5.2      | 0.002**  |
| 1 year                              |                            |                     |          | 3.8                                | 1.8 to 8.0      | <0.001** |
| <b>Anemia</b>                       |                            |                     |          |                                    |                 |          |
| No                                  | Reference                  | –                   | –        | Reference                          | –               | –        |
| Yes                                 | +0.24 (+0.028)             | –0.06 to +0.54      | 0.116    | 2.0                                | 1.1 to 3.8      | 0.028*   |
| <b>Binary Gender</b>                |                            |                     |          |                                    |                 |          |
| Female                              | Reference                  | –                   | –        | Reference                          | –               | –        |
| Male                                | +0.11 (+0.029)             | –0.02 to +0.25      | 0.100    | 1.4                                | 0.97 to 1.1     | 0.076    |
| <b>Bodyweight (in kg)</b>           |                            |                     |          |                                    |                 |          |
| (scaled)                            | –0.02 (–0.051)             | –0.043 to –0.0001   | 0.049*   | 0.998                              | 0.94 to 1.1     | 0.952    |
| <b>Dietary Ca (in mg)</b>           |                            |                     |          |                                    |                 |          |
| (scaled)                            | –0.0002 (–0.055)           | –0.0004 to –0.00004 | 0.015*   | 0.9997                             | 0.999 to 1.0002 | 0.238    |
| <b>Dietary Fe (in mg)</b>           |                            |                     |          |                                    |                 |          |
| (scaled)                            | –0.02 (–0.053)             | –0.03 to –0.002     | 0.025*   | 0.97                               | 0.94 to 1.01    | 0.202    |
| <b>Dietary Zn (in mg)</b>           |                            |                     |          |                                    |                 |          |
| (scaled)                            | +0.03 (+0.064)             | +0.01 to +0.06      | 0.020*   | 1.04                               | 0.97 to 1.1     | 0.248    |
| <b>Health Insurance Coverage</b>    |                            |                     |          |                                    |                 |          |
| Yes                                 | Reference                  | –                   | –        | Reference                          | –               | –        |
| No                                  | +0.19 (+0.030)             | –0.04 to +0.43      | 0.109    | 1.2                                | 0.67 to 2.1     | 0.548    |
| <b>Household Income Level</b>       |                            |                     |          |                                    |                 |          |
| Middle to upper class               | Reference                  | –                   | –        | Reference                          | –               | –        |
| Low income                          | +0.23 per unit             | +0.12 to +0.33      | <0.001** | 2.0                                | 1.1 to 3.3      | 0.014**  |
| Poverty                             | (+0.097)                   |                     |          | 2.3                                | 1.3 to 4.0      | 0.003**  |
| <b>Indoor Household Smoking</b>     |                            |                     |          |                                    |                 |          |
| No                                  | Reference                  | –                   | –        | Reference                          | –               | –        |
| Yes                                 | +0.55 (+0.103)             | +0.35 to +0.74      | <0.001** | 2.0                                | 1.4 to 3.1      | 0.001**  |
| <b>Low Birthweight</b>              |                            |                     |          |                                    |                 |          |
| No                                  | Reference                  | –                   | –        | Reference                          | –               | –        |
| Yes                                 | +0.07 (+0.009)             | –0.18 to +0.31      | 0.597    | 1.4                                | 0.83 to 2.5     | 0.192    |
| <b>Medicaid/CHIP Enrollment</b>     |                            |                     |          |                                    |                 |          |
| No                                  | Reference                  | –                   | –        | Reference                          | –               | –        |
| Yes                                 | +0.17 (+0.041)             | –0.004 to +0.35     | 0.056    | 1.1                                | 0.72 to 1.7     | 0.673    |
| <b>Primary Guardian Education</b>   |                            |                     |          |                                    |                 |          |
| Some college or higher              | Reference                  | –                   | –        | Reference                          | –               | –        |
| 12th grade or GED                   | +0.08 per unit             | –0.01 to +0.17      | 0.074    | 0.87                               | 0.55 to 1.4     | 0.555    |
| Less than 12th grade or GED         | (+0.036)                   |                     |          | 1.3                                | 0.85 to 2.1     | 0.216    |
| <b>Race/Ethnicity</b>               |                            |                     |          |                                    |                 |          |
| NH White or Hispanic                | Reference                  | –                   | –        | Reference                          | –               | –        |
| NH Black                            | +0.73 (+0.154)             | +0.56 to +0.91      | <0.001** | 3.0                                | 2.0 to 4.4      | <0.001** |
| <b>Survey Years</b>                 |                            |                     |          |                                    |                 |          |
| 1999 to 2002                        | Reference                  | –                   | –        | Reference                          | –               | –        |
| 2003 to 2006                        | –0.36 per unit (–          | –0.45 to –0.28      | <0.001** | 0.45                               | 0.30 to 0.67    | <0.001** |
| 2007 to 2010                        | 0.151)                     |                     |          | 0.30                               | 0.19 to 0.49    | <0.001** |
| <b>Water Treatment Devices Used</b> |                            |                     |          |                                    |                 |          |
| No                                  | Reference                  | –                   | –        | Reference                          | –               | –        |
| Yes                                 | –0.15 (–0.035)             | –0.31 to +0.01      | 0.062    | 0.76                               | 0.46 to 1.3     | 0.283    |
| <b>WIC Enrollment</b>               |                            |                     |          |                                    |                 |          |
| No                                  | Reference                  | –                   | –        | Reference                          | –               | –        |

|                           |                |                |          |           |             |          |
|---------------------------|----------------|----------------|----------|-----------|-------------|----------|
| Yes                       | -0.05 (-0.012) | -0.21 to +0.12 | 0.567    | 1.01      | 0.68 to 1.5 | 0.959    |
| <b>Year Housing Built</b> |                |                |          |           |             |          |
| 1978 to present           | Reference      | -              | -        | Reference | -           | -        |
| 1950 to 1977              | +0.60 per unit | +0.52 to +0.69 | <0.001** | 1.9       | 1.2 to 3.1  | 0.007**  |
| Before 1950               | (+0.243)       |                |          | 8.1       | 5.1 to 12.7 | <0.001** |

**Statistical significance:** \* P-value equal to 5% or less; \*\* P-value equal to ≤1% or less.
